# Supplementary material
Source: PubMed Central journal article supplement (PMC6505859)
Supplement: DS1_JVDI_10.1177_1040638717739945.pdf [file DS1_JVDI_10.1177_1040638717739945.pdf]

**Supplementary Table 1.** List of primers with the corresponding target genome region used to detect infectious agents associated with bovine respiratory disease.

| Organism                           | Target genome region                 | Primer sequence                                                                                                                                                  | Fragment length (bp) | Reference |
|------------------------------------|--------------------------------------|------------------------------------------------------------------------------------------------------------------------------------------------------------------|----------------------|-----------|
| Bovine viral diarrhea virus        | 5' untranslated region (5'-UTR)      | 324-F: 5'-ATGCCCWTAGTAGGACTAGGCA-3'<br>326-R: 5'-TCAACTCCATGTGCCATGTAC-3'                                                                                        | 288                  | 8         |
| Bovine respiratory syncytial virus | G attachment glycoprotein gene       | B5A-F: 5'-CCACCCTAGCAATGATAACCTTGAC-3'<br>B6A-R: 5'-AAGAGAGGATGCCTTGCTGTGG-3'<br>B7A-F: 5'-CATCAATCCAAAGCACCACACTGTC-3'<br>B8-R: 5'-GCTAGTTCTGTGGTGGATTGTTGTC-3' | 371                  | 1         |
| Bovine coronavirus                 | Nucleocapsid protein gene            | BCoV1-F: 5'-CGATGAGGCTATTCCGAC-3'<br>BCoV2-R: 5'-TGTGGGTGCGAGTTCTGC-3'<br>BCoV3-F: 5'-TTGCTAGTCTTGTCTGGC-3'                                                      | 251                  | 6         |
| Bovine parainfluenza 3 virus       | Hemagglutinin-neuraminidase gene     | HNfwd-F: 5'-GAATGACTCATGATAGAGGTAT-3'<br>HNseq1-R: 5'-AGGACAACCAGTTGTATTACAT-3'                                                                                  | 647                  | 9         |
| Bovine alphaherpesvirus 1          | Glycoprotein D gene                  | P3-F: 5'-GCTGTGGGAAGCGGTACG-3'<br>P4-R: 5'-GTCGACTATGGCCTTGTGTGC-3'<br>P5-F: 5'-ACGGTCATATGGTACAAGGACAGCG-3'                                                     | 425                  | 4         |
| <i>Pasteurella multocida</i>       | Open reading frame of the clone KMT1 | KMT1SP6-F: 5'-GCTGTAAACGAACTCGCCAC-3'<br>KMT1T7-R: 5'-ATCCGCTATTTACCCAGTGG-3'                                                                                    | 460                  | 7         |
| <i>Histophilus somni</i>           | 16S ribosomal (r)DNA gene            | HS453-F: 5'-GAAGGCGATTAGTTTAAGAG-3'<br>HS860-R: 5'-TTCGGGCACCAAGTRTTCA-3'                                                                                        | 408                  | 2         |
| <i>Mannheimia haemolytica</i>      | lktA-artJ intergenic region          | Mh-F: 5'-GTCCCTGTGTTTTTATTATAAG-3'<br>Mh-R: 5'-CACTCGATAATTATTTCTAAATTAG-3'                                                                                      | 385                  | 3         |
| <i>Mycoplasma bovis</i>            | 16S-23S rDNA intergenic region       | Molli-F: 5'-CCGTCAAACYATGGGAGC-3'<br>Molli-R: 5'-GTGYCCCCGCMTACTCAGG-3'<br>nMb-F: 5'-GTACACTTGTCTTTTATCACTATA-3'<br>nMb-R: 5'-AAGGTATCTCGCTTTATGTCCT-3'          | 488                  | 5         |

## References

1. Almeida RS, et al. Detection of Brazilian bovine respiratory syncytial virus strain by a reverse transcriptase-nested-polymerase chain reaction in experimentally infected calves. *Vet Microbiol* 2005;105:131-135.
2. Angen O, et al. Development of a PCR test for identification of *Haemophilus somnus* in pure and mixed cultures. *Vet Microbiol* 1998;63:39-48.
3. Angen O, et al. Respiratory disease in calves: microbiological investigations on trans-tracheally aspirated bronchoalveolar fluid and acute phase protein response. *Vet Microbiol* 2009;137:165-171.
4. Claus MP, et al. Rapid detection and differentiation of bovine herpesvirus 1 and 5 glycoprotein C gene in clinical specimens by multiplex-PCR. *J Virol Methods* 2005;128:183-188.
5. Oliveira, VHS. Molecular diagnosis of viral and bacterial infections associated with an outbreak of respiratory disease in dairy calves [MS dissertation]. Universidade Estadual de Londrina, Londrina, State of Paraná, Brazil, 2014.
6. Takiuchi E, et al. Improved detection of bovine coronavirus N gene in faeces of calves infected naturally by a semi-nested PCR assay and an internal control. *J Virol Methods* 2006;131:148-154.
7. Townsend KM, et al. Development of PCR assays for species- and type-specific identification of *Pasteurella multocida* isolates. *J Clin Microbiol* 1998;36:1096-1100.
8. Vilček Š, et al. Pestiviruses isolated from pigs, cattle and sheep can be allocated into at least three genogroups using polymerase chain reaction and restriction endonuclease analysis. *Arch Virol* 1994;136:309-323.
9. Zhu Y-M, et al. Isolation and genetic characterization of bovine parainfluenza virus type 3 from cattle in China. *Vet Microbiol* 2011;149:446-451.
